# Supplementary material for: Magnetic Resonance Imaging for Surveillance of Hepatocellular Carcinoma: A Systematic Review and Meta-Analysis
Source: MDPI journal article supplement (doi:10.3390/diagnostics11091665), 2021-09-12

**Supplementary Table S1. Search queries**

| No. | Search queries for MEDLINE                                                                                                                                                                                 |
|-----|------------------------------------------------------------------------------------------------------------------------------------------------------------------------------------------------------------|
| #1  | "Carcinoma, Hepatocellular"[Mesh] OR "Liver Neoplasms"[Mesh:NoExp]                                                                                                                                         |
| #2  | (liver*[TW] OR hepatic*[TW] OR Hepato*[TW]) AND (carcinoma*[TW] OR cancer[TW] OR cancers[TW] OR tumor[TW] OR neoplas*[TW] OR malignan*[TW])                                                                |
| #3  | hepatocarcinoma*[TW] OR hepatoma*[TW] OR "liver carcinoma"[TW] OR HCC[TW]                                                                                                                                  |
| #4  | #1 OR #2 OR #3                                                                                                                                                                                             |
| #5  | "Magnetic Resonance Imaging"[Mesh]                                                                                                                                                                         |
| #6  | Magnetic-Resonanc*[TW] OR "MR"[TI] OR "MRI"[TW] OR "diffusion-weighted"[TW]                                                                                                                                |
| #7  | #5 OR #6                                                                                                                                                                                                   |
| #8  | abbreviat*[TW] OR surveillanc*[TW] OR screen*[TW]                                                                                                                                                          |
| #9  | "Early Detection of Cancer"[Mesh] OR "mass screening"[MeSH] OR "Epidemiological Monitoring"[Mesh]                                                                                                          |
| #10 | #8 OR #9                                                                                                                                                                                                   |
| #11 | "Predictive Value of Tests"[Mesh] OR "Sensitivity and Specificity"[Mesh]                                                                                                                                   |
| #12 | predictive value*[TW] OR detection rate*[TW] OR "False Negative"[TW] OR "False positive"[TW] OR "True Negative"[TW] OR "True positive"[TW] OR "PPV"[TW] OR "NPV"[TW] OR Sensitivit*[TW] OR Specificit*[TW] |
| #13 | "Reproducibility of Results"[Mesh]                                                                                                                                                                         |
| #14 | accurac*[TW] OR Validit*[TW]                                                                                                                                                                               |
| #15 | #11 OR #12 OR #13 OR #14                                                                                                                                                                                   |
| #16 | #4 AND #7 AND #10 AND #15                                                                                                                                                                                  |
| #17 | #16 AND ("2000/01/01"[PDAT] : "3000/12/31"[PDAT]) AND (English[Lang])                                                                                                                                      |
| No. | Search queries for EMBASE                                                                                                                                                                                  |
| #1  | 'liver cell carcinoma'/exp OR 'liver cancer'/de                                                                                                                                                            |
| #2  | ((liver* OR hepatic* OR Hepato*) NEAR/6 (Carcinoma* OR Cancer* OR tumor* OR Neoplas* OR malignan*)):ab,ti,kw                                                                                               |
| #3  | (hepatocarcinoma* OR hepatoma* OR 'liver carcinoma' OR HCC):ab,ti,kw                                                                                                                                       |
| #4  | #1 OR #2 OR #3                                                                                                                                                                                             |
| #5  | 'nuclear magnetic resonance imaging'/exp OR 'MR':ti OR 'MRI':ab,ti,kw                                                                                                                                      |

|     |                                                                                                                                                                                                                             |
|-----|-----------------------------------------------------------------------------------------------------------------------------------------------------------------------------------------------------------------------------|
| #6  | (Magnetic-Resonanc* OR 'diffusion-weighted'):ab,ti,kw                                                                                                                                                                       |
| #7  | #5 OR #6                                                                                                                                                                                                                    |
| #8  | (abbreviat* OR surveillanc* OR screen*):ab,ti,kw                                                                                                                                                                            |
| #9  | 'early cancer diagnosis'/exp OR 'cancer screening'/exp OR 'disease surveillance'/exp                                                                                                                                        |
| #10 | #8 OR #9                                                                                                                                                                                                                    |
| #11 | 'diagnostic accuracy'/exp OR 'predictive value'/exp OR 'sensitivity and specificity'/de                                                                                                                                     |
| #12 | ('predictive value' OR 'predictive values' OR 'detection rate' OR 'detection rates' OR 'False Negative' OR 'False positive' OR 'True Negative' OR 'True positive' OR 'PPV' OR 'NPV' OR Sensitivit* OR Specificit*):ab,ti,kw |
| #13 | (Diagnos* NEAR/3 Accurac*):ab,ti,kw                                                                                                                                                                                         |
| #14 | (Validit*):ab,ti,kw                                                                                                                                                                                                         |
| #15 | #11 OR #12 OR #13 OR #14                                                                                                                                                                                                    |
| #16 | #4 AND #7 AND #10 AND #15                                                                                                                                                                                                   |
| #17 | #16 AND ([english]/lim) AND [2000-2020]/py AND ([article]/lim OR [article in press]/lim OR [review]/lim)                                                                                                                    |
| No. | Search queries for Cochrane                                                                                                                                                                                                 |
| #1  | [mh "Carcinoma, Hepatocellular"] or [mh ^"Liver Neoplasms"]                                                                                                                                                                 |
| #2  | ((Hepatocellular* or liver-cell* or hepatic-cell* or Hepato-cell*) near/6 (Cancer* or tumor* or Neoplas* or carcinoma*)):ab,ti,kw                                                                                           |
| #3  | hepatocarcinoma*:ab,ti,kw or hepatoma*:ab,ti,kw or "liver carcinoma":ab,ti,kw or HCC:ab,ti,kw                                                                                                                               |
| #4  | #1 or #2 or #3                                                                                                                                                                                                              |
| #5  | [mh "Magnetic Resonance Imaging"]                                                                                                                                                                                           |
| #6  | Magnetic-Resonanc*:ab,ti,kw or "MR":ti or "MRI":ab,ti or "diffusion-weighted":ab,ti,kw                                                                                                                                      |
| #7  | #5 or #6                                                                                                                                                                                                                    |
| #8  | abbreviat*:ab,ti,kw or surveillanc*:ab,ti,kw or Monitoring*:ab,ti,kw                                                                                                                                                        |
| #9  | [mh "Early Detection of Cancer"] or [mh "mass screening"] or [mh "Epidemiological Monitoring"]                                                                                                                              |
| #10 | #8 or #9                                                                                                                                                                                                                    |
| #11 | [mh "Predictive Value of Tests"] or [mh "Sensitivity and Specificity"]                                                                                                                                                      |
| #12 | (predictive value* or detection rate* or "False Negative" or "False positive" or "True Negative" or "True positive" or "PPV" or "NPV" or Sensitivit* or                                                                     |

Specificit\*):ab,ti,kw

|     |                                                               |
|-----|---------------------------------------------------------------|
| #13 | [mh "Reproducibility of Results"]                             |
| #14 | (Reproducib* or accurac* or Reliabilit* or Validit*):ab,ti,kw |
| #15 | #11 or #12 or #13 or #14                                      |
| #16 | #4 and #7 and #10 and #15                                     |
| #17 | #16 in Trials(Published); 2000-2020                           |

**Supplementary Table S2. Performance of abbreviated MRI-protocols and full MRI-protocols for the detection of early-stage HCC and very early-stage HCC**

| Early-stage HCC                     |                                 |                                 |                                     |                                 |                                 |
|-------------------------------------|---------------------------------|---------------------------------|-------------------------------------|---------------------------------|---------------------------------|
| <i>Abbreviated MRI-protocols*</i>   |                                 |                                 | <i>Full MRI-protocols</i>           |                                 |                                 |
| <i>Author (year)</i>                | <i>Sensitivity<br/>(95% CI)</i> | <i>Specificity<br/>(95% CI)</i> | <i>Author (year)</i>                | <i>Sensitivity<br/>(95% CI)</i> | <i>Specificity<br/>(95% CI)</i> |
| Sutherland T<br>(2017)              | 80%<br>(28, 99)                 | 98%<br>(95, 100)                | Shah TU<br>(2006)                   | 77%<br>(55, 92)                 | 83%<br>(78, 87)                 |
| Brunsing RL<br>(2019)               | 88%<br>(47, 100)                | 91%<br>(85, 95)                 | Kim SY<br>(2017)                    | 86%<br>(71, 94)                 | 97%<br>(96, 98)                 |
|                                     |                                 |                                 | Demirtas CO<br>(2020)               | 83%<br>(65, 94)                 | 95%<br>(92, 98)                 |
| Meta-analytic<br>pooled estimations | 85%<br>(66, 100)                | 96%<br>(91, 100)                | Meta-analytic<br>pooled estimations | 83%<br>(74, 91)                 | 94%<br>(88, 99)                 |
| Very early-stage HCC                |                                 |                                 |                                     |                                 |                                 |
| <i>Abbreviated MRI-protocols*</i>   |                                 |                                 | <i>Full MRI-protocols</i>           |                                 |                                 |
| <i>Author (year)</i>                | <i>Sensitivity<br/>(95% CI)</i> | <i>Specificity<br/>(95% CI)</i> | <i>Author (year)</i>                | <i>Sensitivity<br/>(95% CI)</i> | <i>Specificity<br/>(95% CI)</i> |
| Chan MV<br>(2019)                   | 59%<br>(34, 83)                 | 95%<br>(87, 100)                | Shah TU<br>(2006)                   | 77%<br>(55, 92)                 | 83%<br>(78, 87)                 |
|                                     |                                 |                                 | Kim SY<br>(2017)                    | 84%<br>(67, 95)                 | 97%<br>(96, 98)                 |
|                                     |                                 |                                 | Demirtas CO<br>(2020)               | 80%<br>(52, 96)                 | 96%<br>(93, 98)                 |
| Meta-analytic<br>pooled estimations | 59%<br>(34, 83)                 | 95%<br>(87, 100)                | Meta-analytic<br>pooled estimations | 81%<br>(71, 91)                 | 94%<br>(89, 99)                 |

\*Consisting of various combinations of imaging sequences without dynamic contrast-enhanced image, including T1-weighted imaging, T2-weighted imaging, diffusion-weighted imaging, and hepatobiliary-phase imaging.

MRI, magnetic resonance imaging; HCC, hepatocellular carcinoma; CI, confidence interval.

**Supplementary Table S3. Results of sensitivity analysis of surveillance MRI for the detection of hepatocellular carcinoma**

|                               | <i>Sensitivity</i><br>(95% CI) | <i>I</i> <sup>2</sup> | <i>Specificity</i><br>(95% CI) | <i>I</i> <sup>2</sup> |
|-------------------------------|--------------------------------|-----------------------|--------------------------------|-----------------------|
| Pooled data for seven studies | 85% (79, 90)                   | 0%                    | 94% (90, 97)                   | 94%                   |
| <i>Excluded study (year)</i>  |                                |                       |                                |                       |
| Shah TU (2006)                | 86% (80, 91)                   | 0%                    | 95% (93, 97)                   | 81%                   |
| Marks RM (2015)               | 84% (77, 90)                   | 0%                    | 95% (90, 97)                   | 95%                   |
| Kim SY (2017)                 | 85% (78, 90)                   | 0%                    | 93% (88, 96)                   | 92%                   |
| Sutherland T (2017)           | 85% (79, 90)                   | 0%                    | 93% (89, 96)                   | 94%                   |
| Brunsing RL (2019)            | 85% (79, 90)                   | 0%                    | 95% (90, 97)                   | 95%                   |
| Chan MV (2019)                | 86% (79, 90)                   | 0%                    | 94% (89, 97)                   | 95%                   |
| Demirtas CO (2020)            | 85% (79, 90)                   | 0%                    | 94% (89, 97)                   | 94%                   |

MRI, magnetic resonance imaging; CI, confidence interval.

**Supplementary Table S4. Results of meta-regression analysis of surveillance MRI for the detection of hepatocellular carcinoma**

| Covariates                                           | Subgroup                                   | Meta-analytic summary estimate |                      |         |
|------------------------------------------------------|--------------------------------------------|--------------------------------|----------------------|---------|
|                                                      |                                            | Sensitivity (95% CI)           | Specificity (95% CI) | P-value |
| Proportion of HCC < 2 cm                             | < 50% or NR (n = 4)                        | 86% (79, 93)                   | 95% (92, 99)         | 0.58    |
|                                                      | > 50% (n = 3)                              | 84% (75, 93)                   | 92% (86, 98)         |         |
| The most common etiology of underlying liver disease | Hepatitis C virus (n = 3)                  | 85% (77, 93)                   | 88% (84, 92)         | 0.01    |
|                                                      | Hepatitis B virus (n = 4)                  | 85% (78, 92)                   | 97% (95, 98)         |         |
| HCC prevalence in each study                         | < 10% (n = 3)                              | 83% (71, 95)                   | 92% (87, 98)         | 0.71    |
|                                                      | > 10% (n = 4)                              | 86% (80, 91)                   | 95% (92, 98)         |         |
| Study location                                       | Western (n = 5)                            | 85% (78, 92)                   | 93% (89, 96)         | 0.43    |
|                                                      | Eastern (n = 2)                            | 86% (78, 94)                   | 96% (93, 99)         |         |
| Study period                                         | < 2005 (n = 1)                             | 77% (55, 92)                   | 83% (78, 87)         | 0.05    |
|                                                      | ≥ 2005 (n = 6)                             | 86% (81, 91)                   | 95% (93, 97)         |         |
| MRI magnet                                           | 3.0-T only (n = 2)                         | 84% (75, 93)                   | 95% (90, 100)        | 0.85    |
|                                                      | 1.5-T, both 1.5- and 3.0-T, or NR (n = 5)  | 86% (80, 92)                   | 94% (90, 98)         |         |
| MRI contrast agent*                                  | Hepatocyte-specific contrast agent (n = 3) | 87% (81, 94)                   | 94% (90, 98)         | < 0.01  |
|                                                      | Extracellular contrast agent (n = 2)       | 82% (72, 92)                   | 91% (83, 98)         |         |
| Reference standard for HCC                           | Imaging only (n = 2)                       | 85% (74, 96)                   | 93% (86, 100)        | 0.92    |
|                                                      | Pathology or imaging (n = 5)               | 85% (80, 91)                   | 94% (91, 98)         |         |
| Reference standard for non-HCC                       | Explantation only (n = 1)                  | 77% (55, 92)                   | 83% (78, 87)         | 0.05    |
|                                                      | Imaging follow-up (n = 6)                  | 86% (81, 91)                   | 95% (93, 97)         |         |
| Follow-up period                                     | < mean 6 months (n = 1)                    | 82% (62, 93)                   | 95% (89, 97)         | 0.87    |
|                                                      | ≥ mean 6 months (n = 6)                    | 86% (80, 91)                   | 94% (91, 97)         |         |

The results were obtained using meta-regression analysis with the bivariate model.

\*Two articles that used non-enhanced MRI were excluded.

MRI, magnetic resonance imaging; HCC, hepatocellular carcinoma; NR, not reported.

**Supplementary Figure S1. Deeks' funnel plot to evaluate publication bias of surveillance MRI**

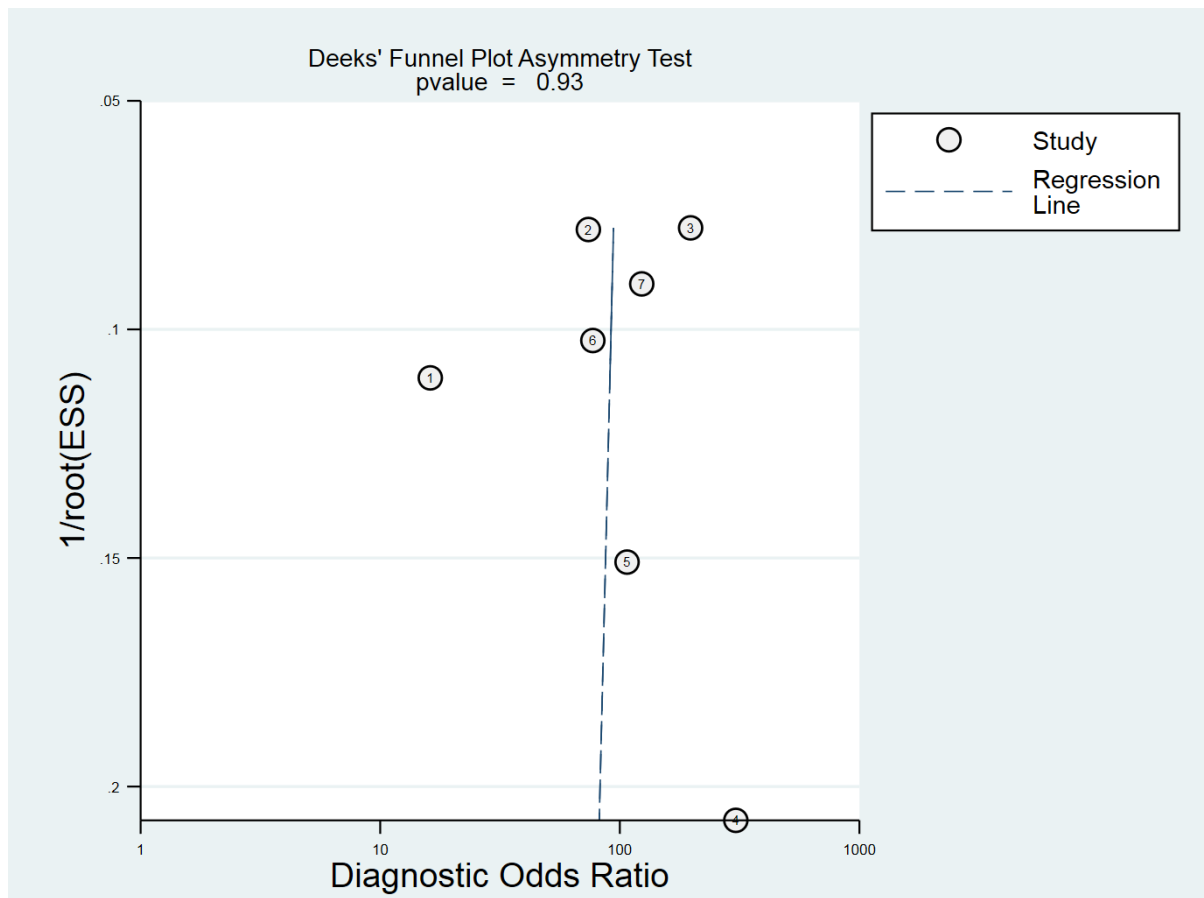

Supplement: s1 [file s1]
